# Supplementary material for: Situational crime analysis of poaching within Territorial Use Rights Fisheries (TURFs)
Source: Frontiers journal article supplement (doi:10.3389/fmars.2024.1419800), 2024-08-06
Supplement: Table_4.pdf [file Table_4.pdf]

## SM-D

**Table 4:** Example of extracted narratives from interview with fishers, government, and experts for the key elements of crime script surrounding poaching Loco's. Fishers include TURFs members and poachers. Government includes SUBPESCA (National Fisheries and Aquaculture Subsecretary) and SERNAPESCA (National Fisheries and Aquaculture Service) officials. Experts include research experts in the loco fishery. News includes news article regarding poaching events inside TURFs from 2000 to 2023.

| Steps            | Fishers                                                                                                                                                                                 | Government                                                                                                                                                                                                                                                 | Experts                                                                                                                                                                  | News                                                                                                                                                                                                                      |
|------------------|-----------------------------------------------------------------------------------------------------------------------------------------------------------------------------------------|------------------------------------------------------------------------------------------------------------------------------------------------------------------------------------------------------------------------------------------------------------|--------------------------------------------------------------------------------------------------------------------------------------------------------------------------|---------------------------------------------------------------------------------------------------------------------------------------------------------------------------------------------------------------------------|
| 1. Preparation   | <i>"They travel with two divers, have an assistant and a motorist, there are four or five of them..."</i><br><b>TURF-JC</b>                                                             | <i>"Fiberglass boats of 10 or more meters in length, with motors of more than 150 HP; the boat-motor set, we are talking about a value of more than 30 million pesos."</i> <b>SERNAPESCA-EA</b>                                                            | <i>"They arrive by truck from Ancud to Quemchi, and from Quemchi they were diving in a management area and extracting loco..."</i> <b>EXPERT-CM</b>                      | <i>"Maritime Police obtained the arrest along with the confiscation of two boats, two trucks, diving equipment and 30 kilos of marine product."</i><br><b>NEWS-51</b>                                                     |
| 2. Entry         | <i>"It's like a swarm. and they are there for a while and then they go further north, they arrive at Estaquilla, Capitana, to San Pedro and beyond, and they travel"</i> <b>TURF-HM</b> | <i>"The loco fishery is located in remote areas, making it difficult to regularly monitor and enforce regulations. As a result, illegal activities such as poaching are more likely to occur and remain hidden from authorities..."</i> <b>SUBPESCA-RH</b> | <i>"The free riders can act outside or inside (TURFs), right? The ones from the union can also act inside and outside (TURFs)." <b>EXPERT-CC</b></i>                     | <i>"SERNAPESCA estimates that they take the equivalent of 25% or 40% of the legal landing, depending on the region. Last year that was equivalent to about 1,080 tons, valued at about US\$8 million."</i> <b>NEWS-46</b> |
| 3. Preconditions | <i>"At night (when poaching), and if they are given the opportunity during the day, as well..."</i><br><b>TURF-OB</b>                                                                   | <i>"In terms of boats, they have greater speed than the navy, so it becomes very difficult..."</i><br><b>SUBPESCA-RH</b>                                                                                                                                   | <i>"What happens is that the legal ones are also illegal, the same intermediaries that operate legally, when they can, they also operate illegally"</i> <b>E-WS-2021</b> | <i>"The most serious problem is that we have smaller boats, the largest of seven meters, versus eleven-meter boats, which today we do not have the possibility of fighting."</i> <b>N-40-2017</b>                         |

|                               |                                                                                                                                                                                                                            |                                                                                                                                                                                                                                      |                                                                                                                                                                                                                                                                                                                                  |                                                                                                                                                                                                                                                                                    |
|-------------------------------|----------------------------------------------------------------------------------------------------------------------------------------------------------------------------------------------------------------------------|--------------------------------------------------------------------------------------------------------------------------------------------------------------------------------------------------------------------------------------|----------------------------------------------------------------------------------------------------------------------------------------------------------------------------------------------------------------------------------------------------------------------------------------------------------------------------------|------------------------------------------------------------------------------------------------------------------------------------------------------------------------------------------------------------------------------------------------------------------------------------|
| 4. Instrumental precondition  | <p><i>"They sweep with everything, it can be said. Young and old, they do not choose, but they arrive, come and throw themselves away, take out and leave; the thing is to load their boat."</i></p> <p><b>TURF-JH</b></p> | <p><i>"Because those who illegally extract Locos don't care about the size."</i> <b>SERNAPESCA -EA</b></p>                                                                                                                           | <p><i>"... if there are big locos, they will take out the big ones; if there are mediums, they will take out the mediums. If there is one that is undersized, they will catch it. But they will try to grab the biggest ones. What happens is that if there is not and they need to add the volume. .."</i> <b>EXPERT-CT</b></p> | <p><i>"...who carried 69 units of the aforementioned, those that were under the minimum size and in a natural state."</i> <b>NEWS-4</b></p>                                                                                                                                        |
| 5. Instrumental initiation    | <p><i>"They arrive, they know where the "loco" is located using GPS, and they arrive at night and say, "Okay, here's the loco," the GPS guides them, they descend with lights and work."</i></p> <p><b>TURF-SH</b></p>     | <p><i>"Because the management areas there have few resources, so what they do is they proceed to the Estaquilla area and begin to assault the management areas of the groups that are mobilized there."</i> <b>SERNAPESCA-EA</b></p> | No Mention                                                                                                                                                                                                                                                                                                                       | No mention                                                                                                                                                                                                                                                                         |
| 6. Instrumental actualization | <p><i>"You go to steal, right, and you have to bring them already shelled."</i> <b>POACHER-RM</b></p>                                                                                                                      | No Mention                                                                                                                                                                                                                           | <p><i>"Because the (poached) "loco" was shelled almost inside the boat, and arrived shucked at a certain part of Ancud."</i> <b>EXPERT-JC</b></p>                                                                                                                                                                                | <p><i>Diver. had injuries attributable to dragging on the seabed, when the boat to which he was attached escaped, before its air hoses were cut. "They cut his (oxygen) hoses and left him to his fate in the sea," said the chief prosecutor of Maullín.</i> <b>N-29-2016</b></p> |

|                    |                                                                                                                                                                                                                                                                                                |                                                                                                                                                                                                                                                                                                                            |                                                                                                                                                                     |                                                                                                                                                                                                                                                                                                                                                                                                                                                                          |
|--------------------|------------------------------------------------------------------------------------------------------------------------------------------------------------------------------------------------------------------------------------------------------------------------------------------------|----------------------------------------------------------------------------------------------------------------------------------------------------------------------------------------------------------------------------------------------------------------------------------------------------------------------------|---------------------------------------------------------------------------------------------------------------------------------------------------------------------|--------------------------------------------------------------------------------------------------------------------------------------------------------------------------------------------------------------------------------------------------------------------------------------------------------------------------------------------------------------------------------------------------------------------------------------------------------------------------|
| 7. Doing           | <i>"Nowadays, they travel with a marine radio, so when we call the navy, they already know and say, 'Oh, no, the navy is coming,' so... they have already calculated the schedule of when the navy leaves from Carelmapu until they arrive at a certain management area..." <b>TURF-HO</b></i> | <i>"There is a gradient, because we can start with those who are normalized, that we are talking about an organization that participates, that extracts in small quantities within a certain range, to some extent. ... up to the other one who goes and sweeps and takes everything they find." <b>SERNAPESCA -EA</b></i> | <i>"We didn't want to leave (the TURF) until they left, so we approached them to buy what they were bringing, was (illegal) locos <b>EXPERT-CM</b></i>              | <i>"They sail from Ancud and we have counted up to 15 vessels in a management area. Each one extracts about 2,000 to 2,500 units in an hour. That is equivalent to between 2 and \$2.5 million," he says. And although they often identify themselves as fishermen, they move in an atypical way: they use fiberglass boats, costing between \$7 and \$10 million, and with powerful engines of up to 250 HP that are worth more than \$20 million. <b>N-46-2018</b></i> |
| 8. Post-conditions | <i>"Anywhere (poachers disembark), where there is less authority surveillance." <b>TURFS-MA</b></i>                                                                                                                                                                                            | <i>"Also, because the figure is in the landing; In other words, if I find a boat that is transporting locos at sea, well, it would have to have the fishing registry... there is also an illegal act, but if they catch it, they can violate the controls." <b>SERNAPESCA -EA</b></i>                                      | <i>"It arrived already removed from the shell to a certain part of Ancud, and there was a process to transport it to the consumption centers." <b>EXPERT-JC</b></i> | <i>The navy pointed out that "there were two boats in the beach sector and a truck unloading sacks, so the patrol appeared in the sector detecting the boats and the truck." Barrios said that people fled the area by sea and land, leaving behind the valuable cargo of the marine resource. Once the product was accounted for, the existence of 3,795 units with an appraisal of more than \$7 million was verified. <b>NEWS-74</b></i>                              |

|         |                                                                                                                                                                                                                                                                                                                                 |                                                                                                                                                                                                                                                                                  |                                                                                                                                                                                                                                          |                                                                                                                                                                                                                                                                                                           |
|---------|---------------------------------------------------------------------------------------------------------------------------------------------------------------------------------------------------------------------------------------------------------------------------------------------------------------------------------|----------------------------------------------------------------------------------------------------------------------------------------------------------------------------------------------------------------------------------------------------------------------------------|------------------------------------------------------------------------------------------------------------------------------------------------------------------------------------------------------------------------------------------|-----------------------------------------------------------------------------------------------------------------------------------------------------------------------------------------------------------------------------------------------------------------------------------------------------------|
| 9. Exit | <p><i>“Those who steal smaller amounts from the management area go to their own homes. And those who steal in large quantities, like the people who come from Ancud, who go out to steal 4-5 boats, 10 boats, 11 boats; they go to a specific plant, where that locos then floods the national market.”</i> <b>TURFS-ZB</b></p> | <p><i>“It often happens that the marketer, who may be a marketer dedicated to sales and trafficking of fishing resources, may be advancing money to the fisherman. And there comes a time when he has to fulfill, he has to cover the debt he has.”</i><b>SERNAPESCA -EA</b></p> | <p><i>So if you go to a restaurant and ask for loco and the restaurant says, "yes, they are legal." How do you know? Do you have a paper? Because if you don't have a paper, it creates a chain of illegality.”</i> <b>EXPERT-CC</b></p> | <p><i>“I sell cooked or frozen locos, vacuum-sealed. Deliveries in a convenient subway,” says one of the many ads that circulate on websites and social networks. There are conversations with customers about weight and prices, which range from \$13,000 to \$25,000 per dozen.</i> <b>NEWS-46</b></p> |
|---------|---------------------------------------------------------------------------------------------------------------------------------------------------------------------------------------------------------------------------------------------------------------------------------------------------------------------------------|----------------------------------------------------------------------------------------------------------------------------------------------------------------------------------------------------------------------------------------------------------------------------------|------------------------------------------------------------------------------------------------------------------------------------------------------------------------------------------------------------------------------------------|-----------------------------------------------------------------------------------------------------------------------------------------------------------------------------------------------------------------------------------------------------------------------------------------------------------|
